# Supplementary material for: Management of Green Mold Disease in White Button Mushroom (Agaricus bisporus) and Its Yield Improvement
Source: J Fungi (Basel). 2022 May 24;8(6):554. doi: 10.3390/jof8060554 (PMC9225557; doi:10.3390/jof8060554)
Supplement: Supplementary file 1 [file jof-08-00554-s001.zip › jof-1701106-supplementary.pdf]

Supplementary Materials: Table S1: Table represents mean sum of squares of non-systemic fungicides; Table S2: Table of mean sum of squares of systemic fungitoxicants

**Table S1: Mean sum of squares of Non Systemic fungicides:**

| Source of Variation                                                                               | Degree of Freedom | Mean Sum of square | Grand Mean | C.V. |
|---------------------------------------------------------------------------------------------------|-------------------|--------------------|------------|------|
| Effect of non-systemic fungicides on Intensity(%) of green mould disease of white button mushroom |                   |                    |            |      |
| ENVIRONMENT-I                                                                                     |                   |                    |            |      |
| Treatment                                                                                         | 10                | 2.491*             | 2.153      | 0.15 |
| ENVIRONMENT-II                                                                                    |                   |                    |            |      |
| Treatment                                                                                         | 10                | 2.949*             | 2.305      | 0.20 |
| Pooled                                                                                            |                   |                    |            |      |
| Treatment                                                                                         | 10                | 0.379*             | 2.229      | 0.21 |
| Environment                                                                                       | 1                 | 5.399*             |            |      |
| Interaction                                                                                       | 10                | 0.409*             |            |      |
| Effect of Non Systemic fungicides on number of fruit bodies                                       |                   |                    |            |      |
| Treatment                                                                                         | 10                | 9.759*             | 92.73      | 0.04 |
| Effect of Non Systemic fungicides on fruit bodies weight                                          |                   |                    |            |      |
| Treatment                                                                                         | 10                | 2.606*             | 10.64      | 0.19 |
| Effect of Non Systemic fungicides on button yield                                                 |                   |                    |            |      |
| Treatment                                                                                         | 10                | 20.86*             | 12.01      | 0.16 |
| Effect of Non Systemic fungicides on weight of pileus                                             |                   |                    |            |      |
| Treatment                                                                                         | 10                | 1.232*             | 6.687      | 0.30 |
|                                                                                                   |                   |                    |            |      |
| Effect of Non Systemic fungicides on diameter of pileus                                           |                   |                    |            |      |
| Treatment                                                                                         | 10                | 0.326*             | 3.584      | 0.56 |
| Effect of Non Systemic fungicides on weight of stipe                                              |                   |                    |            |      |
| Treatment                                                                                         | 10                | 0.107*             | 4.539      | 0.44 |
| Effect of Non Systemic fungicides on diameter of stipe                                            |                   |                    |            |      |
| Treatment                                                                                         | 10                | 0.492*             | 1.262      | 1.58 |
| Effect of Non systemic fungicides on <i>Trichoderma harzianum</i>                                 |                   |                    |            |      |
| Treatment                                                                                         | 5                 | 7.657*             | 48.85      | 3.6  |
| Effect of Non systemic fungicides on <i>Agaricus bisporus</i>                                     |                   |                    |            |      |
| Treatment                                                                                         | 5                 | 10813*             | 18.07      | 2.7  |

\* Significance at 5%

**Table S2: Mean sum of squares of Systemic Fungitoxicants:**

| Source of Variation                                                                            | Degree of Freedom | Mean Sum of square | Grand Mean | C.V. |
|------------------------------------------------------------------------------------------------|-------------------|--------------------|------------|------|
| Effect of systemic fungicides on Intensity (%) of green mould disease of white button mushroom |                   |                    |            |      |
| ENVIRONMENT-I                                                                                  |                   |                    |            |      |
| Treatment                                                                                      | 10                | 2.180*             | 2.726      | 0.12 |
| ENVIRONMENT-II                                                                                 |                   |                    |            |      |
| Treatment                                                                                      | 10                | 2.431*             | 2.462      | 0.16 |
| Pooled                                                                                         |                   |                    |            |      |
| Treatment                                                                                      | 10                | 4.568*             | 2.594      | 0.14 |
| Environment                                                                                    | 1                 | 1.151*             |            |      |
| Interaction                                                                                    | 10                | 0.442*             |            |      |
| Effect of Systemic fungicides on number of fruit bodies                                        |                   |                    |            |      |
| Treatment                                                                                      | 10                | 29.65*             | 93.88      | 0.04 |
| Effect of Systemic fungicides on fruit bodies weight                                           |                   |                    |            |      |
| Treatment                                                                                      | 10                | 0.315*             | 10.74      | 0.19 |
| Effect of Systemic fungicides on button yield                                                  |                   |                    |            |      |
| Treatment                                                                                      | 10                | 11.45*             | 10.48      | 0.16 |
| Effect of Systemic fungicides on weight of pileus                                              |                   |                    |            |      |
| Treatment                                                                                      | 10                | 0.354*             | 6.039      | 0.33 |
|                                                                                                |                   |                    |            |      |
| Effect of Systemic fungicides on diameter of pileus                                            |                   |                    |            |      |
| Treatment                                                                                      | 10                | 0.137*             | 3.652      | 0.55 |
| Effect of Systemic fungicides on weight of stipe                                               |                   |                    |            |      |
| Treatment                                                                                      | 10                | 0.802*             | 4.768      | 0.42 |
| Effect of Systemic fungicides on diameter of stipe                                             |                   |                    |            |      |
| Treatment                                                                                      | 10                | 0.856*             | 1.311      | 1.53 |
| Effect of Systemic fungicides on Trichoderma harzianum                                         |                   |                    |            |      |
| Treatment                                                                                      | 4                 | 9.262*             | 58.72      | 1.75 |
| Effect of Systemic fungicides on Agaricus bisporus                                             |                   |                    |            |      |
| Treatment                                                                                      | 4                 | 6327*              | 21.18      | 1.3  |

\* Significant at 5%
